# Supplementary material for: A pH-responsive supramolecular antibacterial agent based on host–guest chemistry
Source: Royal Society of Chemistry journal article supplement (doi:10.1039/d3nj03139j), 2023-01-01
Supplement: d3nj03139j1.pdf [file d3nj03139j1.pdf]

## Supporting information

### **A pH-responsive supramolecular antibacterial agent based on host-guest chemistry**

Ren-Yi Xiong, Yi-Ru Ruan, Na Zhou, Xiao-Qiang Wang, Lingling Li, Wenjing Wang\*

*School of Chemistry and Chemical Engineering, Wuhan University of Science and Technology, Wuhan 430081, China*

\*Correspondence to: wangwj@wust.edu.cn (W. Wang).

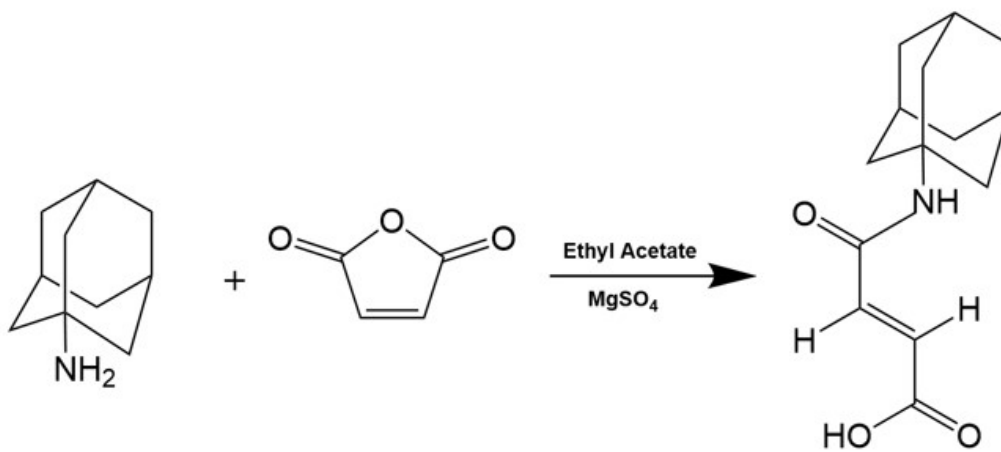

**Scheme S1.** Synthetic scheme of ADA-MA.

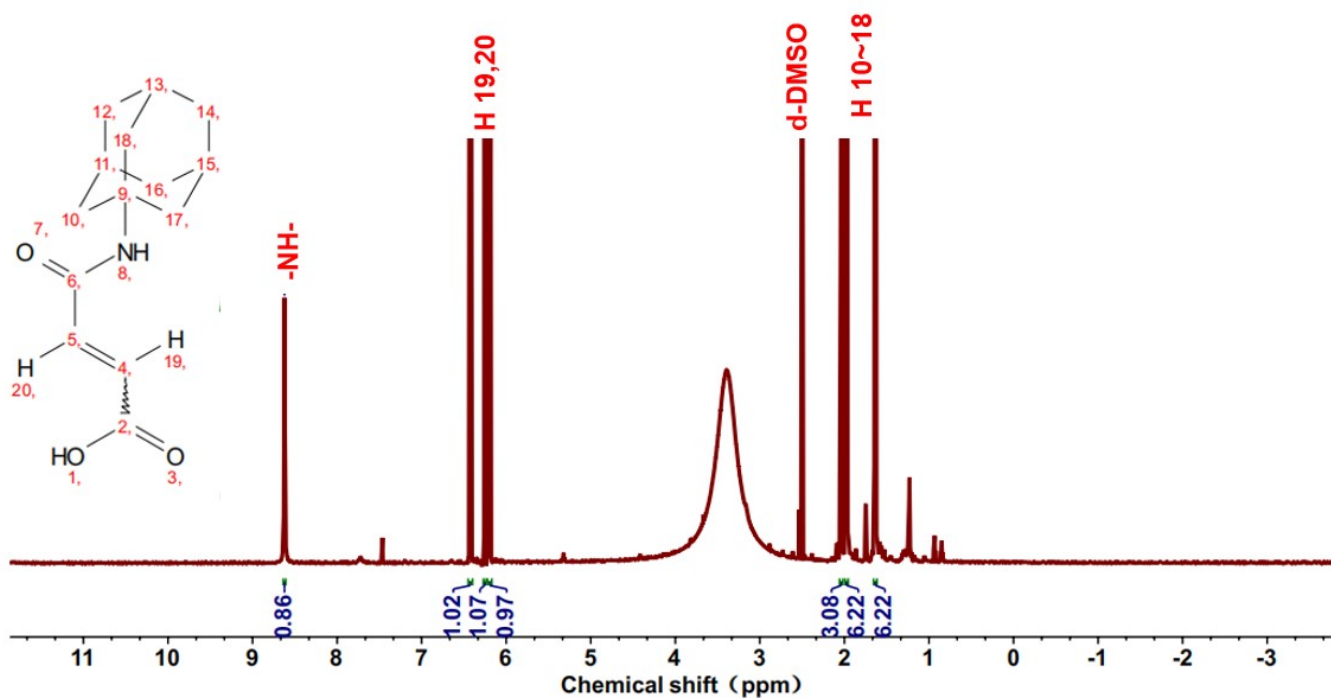

**Fig. S1.** <sup>1</sup>H NMR spectra of ADA-MA in d-DMSO.

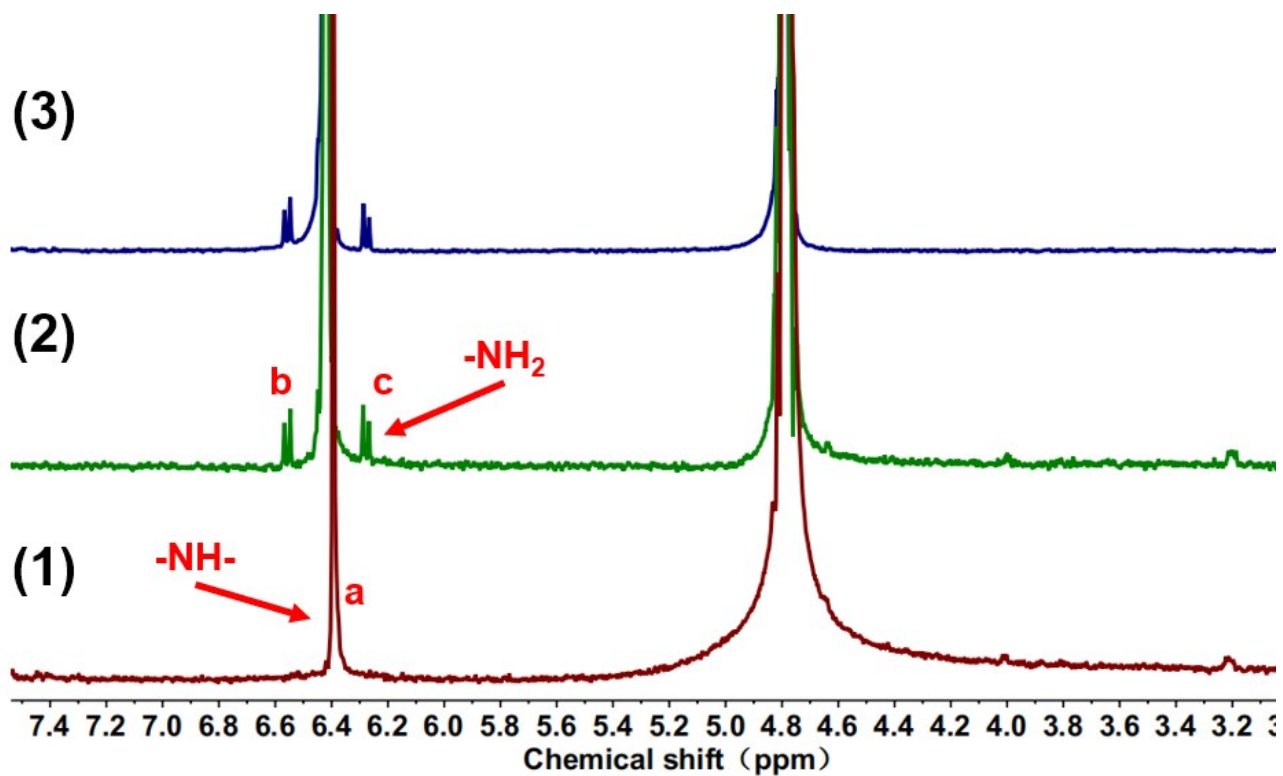

**Fig. S2.**  $^1\text{H}$  NMR spectra of 1) ADA-MA in  $\text{D}_2\text{O}$  (pH 7.4) incubated for 12 h, 2) ADA-MA in  $\text{D}_2\text{O}$  (pH 5.8) incubated for 12 h, 3) ADA-MA in  $\text{D}_2\text{O}$  (pH 5.8) incubated for 16 h.

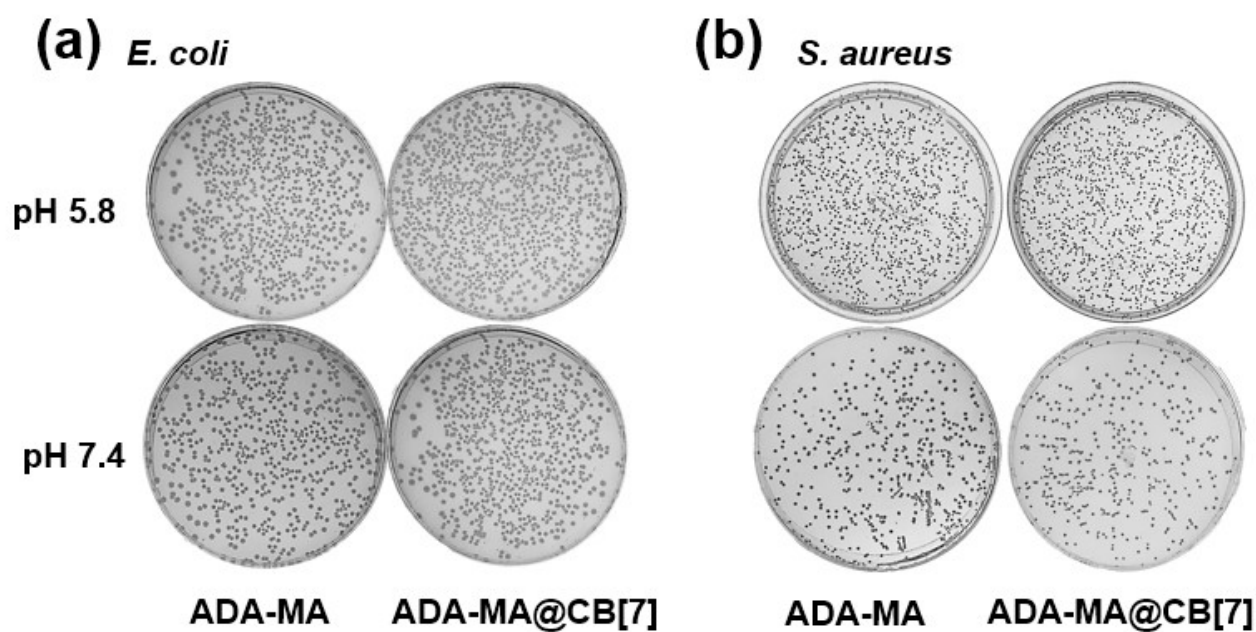

**Fig. S3.** Colony-forming units (CFU) of (a) *E. coli* and (b) *S. aureus* treated with ADA-MA and ADA-MA@CB[7] complexes on LB agar plates with different pH conditions.

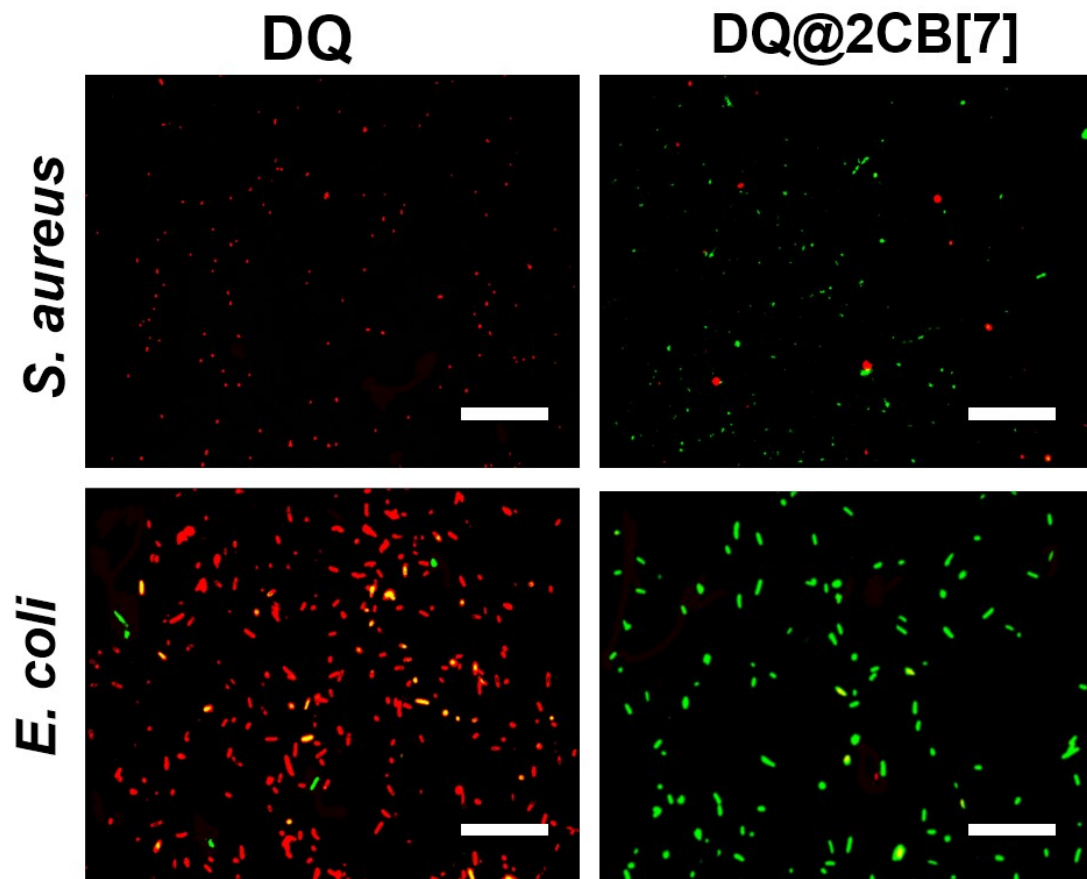

**Fig. S4.** Fluorescence microscopy images of *E. coli* and *S. aureus* with DQ and DQ@2CB[7]. Scale bar = 20  $\mu\text{m}$ . (green staining represents live bacteria, and red staining represents dead bacteria).
