# Supplementary figures and images for: A pH-responsive supramolecular antibacterial agent based on host–guest chemistry
Source: Royal Society of Chemistry journal article supplement (doi:10.1039/d3nj03139j), 2023-01-01

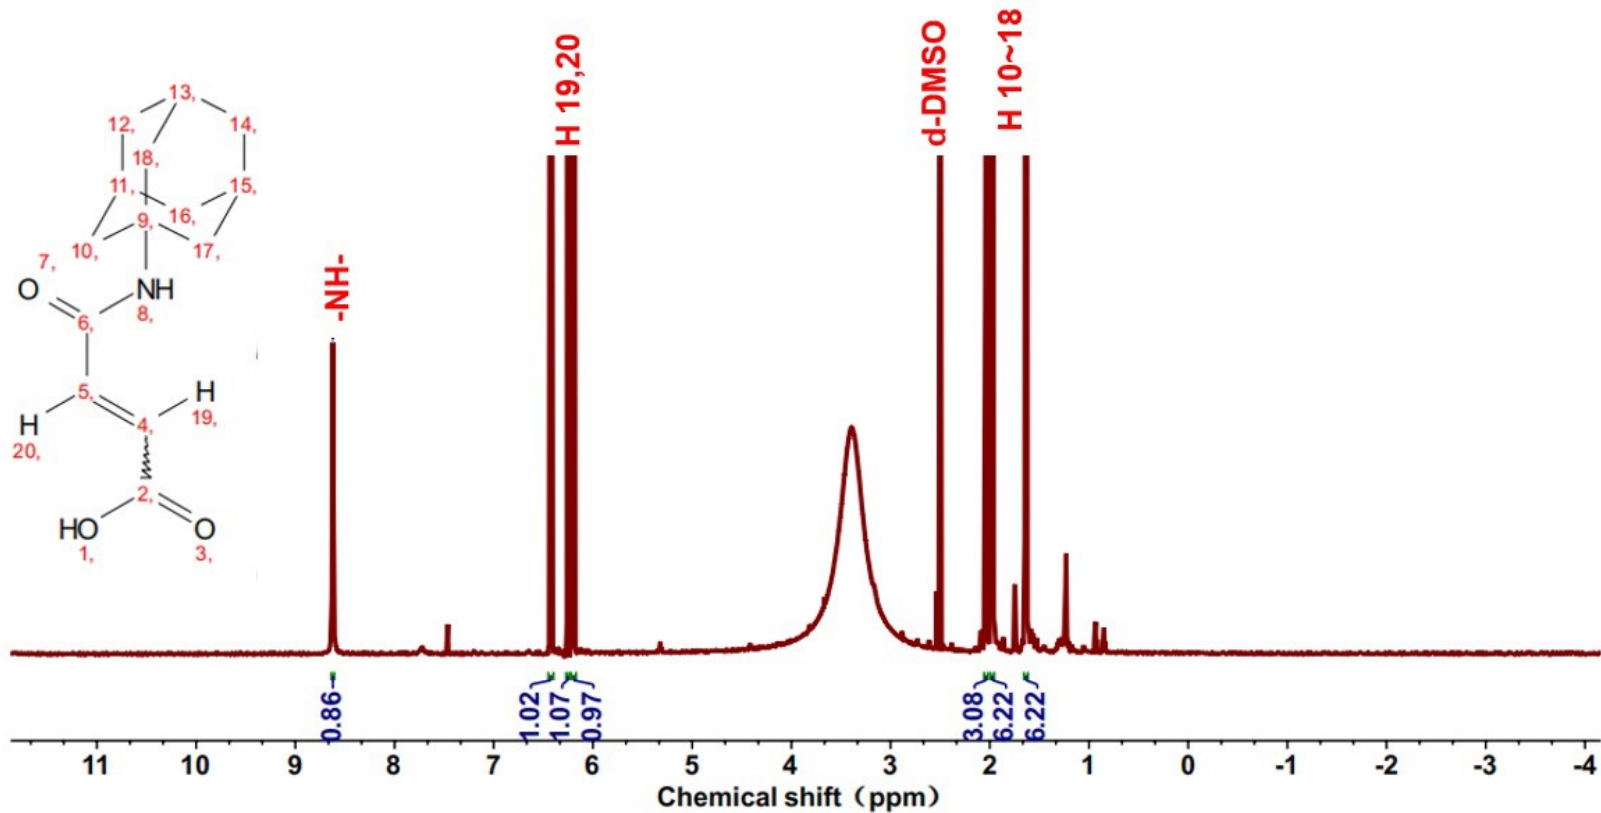

Supplement: d3nj03139j3.pdf [file d3nj03139j3.pdf]

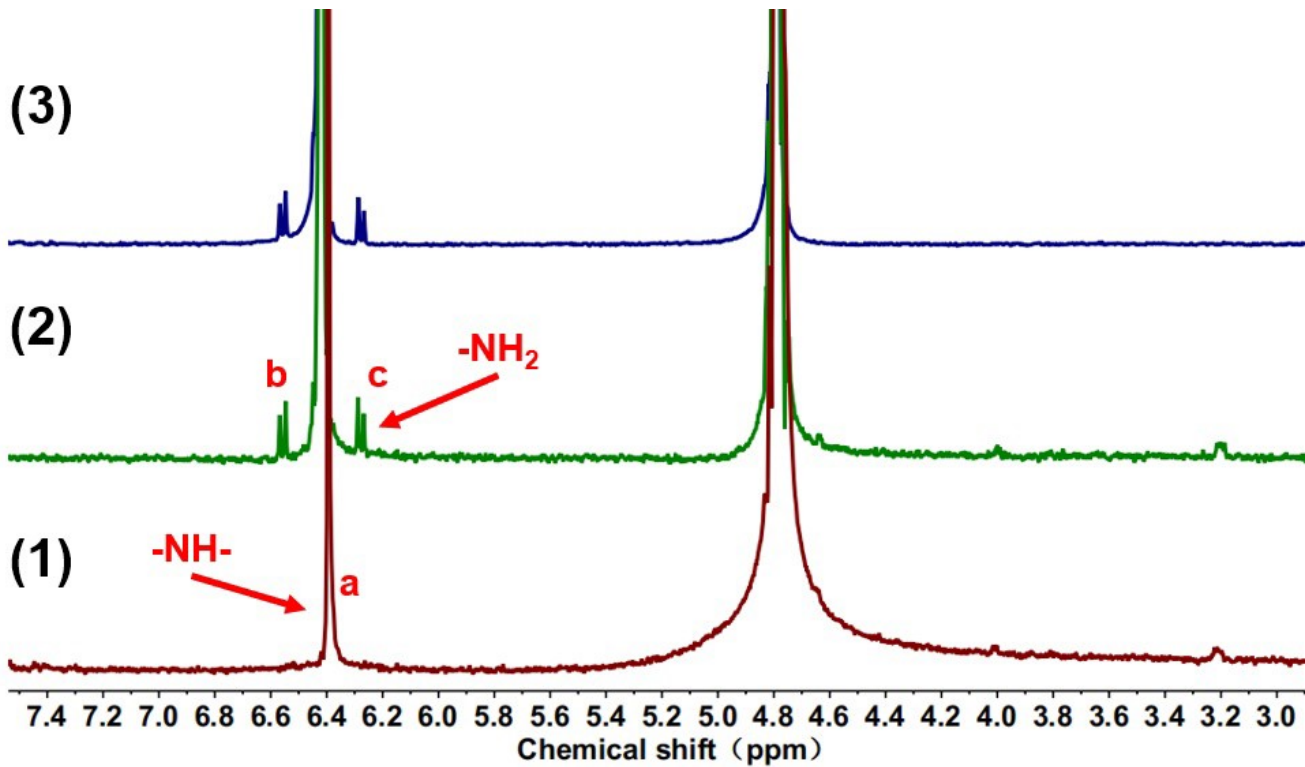

Supplement: d3nj03139j4.pdf [file d3nj03139j4.pdf]

**(a)** *E. coli*

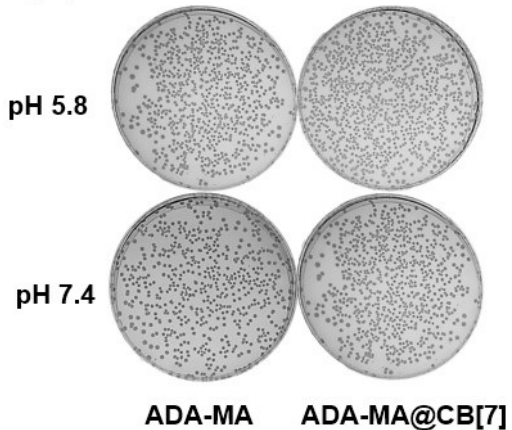

**(b)** *S. aureus*

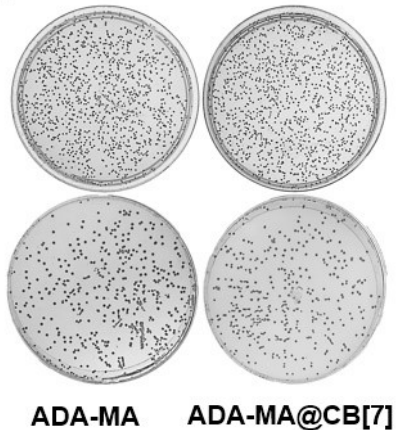

Supplement: d3nj03139j5.pdf [file d3nj03139j5.pdf]

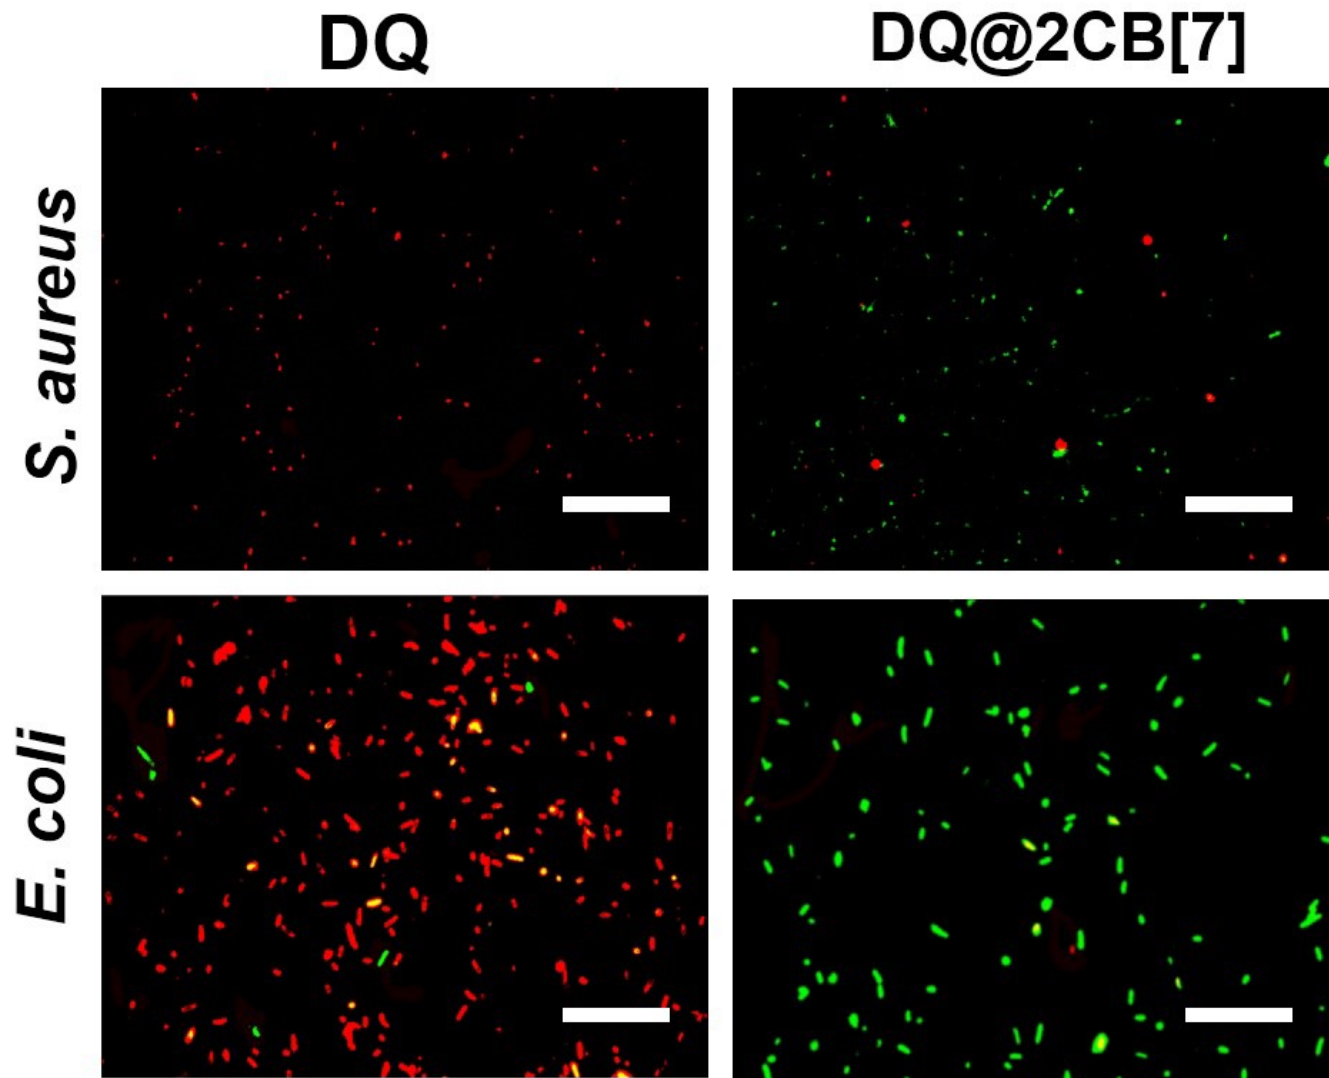

Supplement: d3nj03139j6.pdf [file d3nj03139j6.pdf]

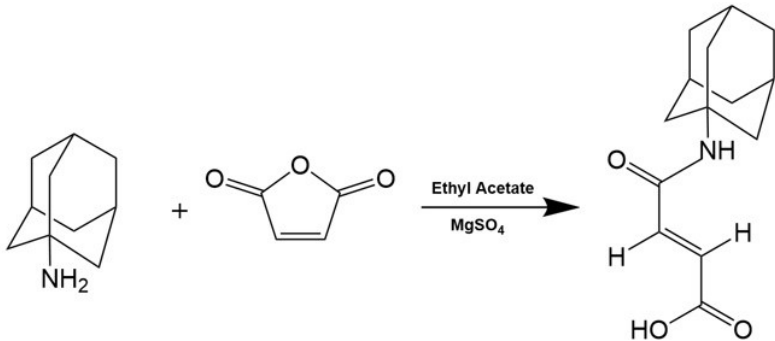

Supplement: d3nj03139j7.pdf [file d3nj03139j7.pdf]
